# Supplementary material for: Impact of prestroke physical activity and citalopram treatment on poststroke depressive symptoms: a secondary analysis of data from the TALOS randomised controlled trial in Denmark
Source: HighWire-hosted journal article supplement (doi:10.1136/bmjopen-2022-070822), 2023-03-01
Supplement: bmjopen-2022-070822supp001_data_supplement.pdf [file bmjopen-2022-070822supp001_data_supplement.pdf]

**Supplementary Table 1. Baseline characteristics of study patients overall and by PASE questionnaire respondent**

|                                     | PASE questionnaire respondent |              |             |
|-------------------------------------|-------------------------------|--------------|-------------|
|                                     | Overall                       | Next of kin  | Patient     |
| <b>N</b>                            | 625                           | 61 (10%)     | 564 (90%)   |
| <b>PASE score quartile, n (%)</b>   |                               |              |             |
| <b>1<sup>st</sup></b>               | 157 (25%)                     | 15 (25%)     | 142 (25%)   |
| <b>2<sup>nd</sup></b>               | 156 (25%)                     | 18 (30%)     | 138 (24%)   |
| <b>3<sup>rd</sup></b>               | 156 (25%)                     | 14 (23%)     | 142 (25%)   |
| <b>4<sup>th</sup></b>               | 156 (25%)                     | 14 (23%)     | 142 (25%)   |
| <b>Study treatment, n (%)</b>       |                               |              |             |
| <b>Citalopram</b>                   | 309 (49%)                     | 31 (51%)     | 278 (49%)   |
| <b>Placebo</b>                      | 316 (51%)                     | 30 (49%)     | 286 (51%)   |
| <b>Female, n (%)</b>                | 215 (34%)                     | 27 (44%)     | 188 (33%)   |
| <b>Age, median (IQR)</b>            | 69 (60, 77)                   | 70 (63, 77)  | 69 (59, 77) |
| <b>Cohabitation, n (%)</b>          | 409 (65%)                     | 38 (62%)     | 371 (66%)   |
| <b>History of smoking, n (%)</b>    | 195 (32%)                     | 24 (41%)     | 171 (31%)   |
| <b>Missing</b>                      | 17                            | 2            | 15          |
| <b>Diabetes, n (%)</b>              | 71 (11%)                      | 6 (9.8%)     | 65 (12%)    |
| <b>Missing</b>                      | 7                             | 0            | 7           |
| <b>Hypertension, n (%)</b>          | 325 (52%)                     | 32 (52%)     | 293 (52%)   |
| <b>Missing</b>                      | 5                             | 0            | 5           |
| <b>Atrial Fibrillation, n (%)</b>   | 102 (17%)                     | 15 (25%)     | 87 (16%)    |
| <b>Missing</b>                      | 7                             | 1            | 6           |
| <b>Prior MI, n (%)</b>              | 52 (8.4%)                     | 7 (12%)      | 45 (8.1%)   |
| <b>Missing</b>                      | 9                             | 1            | 8           |
| <b>Prior TIA, n (%)</b>             | 16 (2.6%)                     | 2 (3.3%)     | 14 (2.5%)   |
| <b>Missing</b>                      | 9                             | 0            | 9           |
| <b>PAD, n (%)</b>                   | 25 (4.1%)                     | 4 (6.6%)     | 21 (3.8%)   |
| <b>Missing</b>                      | 14                            | 0            | 14          |
| <b>Baseline NIHSS, median (IQR)</b> | 3 (2, 6)                      | 11 (4, 18.5) | 3 (2, 5)    |
| <b>Missing</b>                      | 12                            | 2            | 10          |

|                                           |                |               |                |
|-------------------------------------------|----------------|---------------|----------------|
| <b>Reperfusion, n(%)</b>                  | 237 (38%)      | 33 (54%)      | 204 (36%)      |
| <b>Follow-up time, days, median (IQR)</b> | 180 (161, 185) | 175 (40, 183) | 180 (167, 185) |

PASE: Physical Activity Scale for the Elderly, MI: myocardial infarction, PAD: peripheral arterial disease, NIHSS: National Institute of Health Stroke Scale, IQR: interquartile range
