# Supplementary material for: Impact of prestroke physical activity and citalopram treatment on poststroke depressive symptoms: a secondary analysis of data from the TALOS randomised controlled trial in Denmark
Source: HighWire-hosted journal article supplement (doi:10.1136/bmjopen-2022-070822), 2023-03-01
Supplement: bmjopen-2022-070822supp003_data_supplement.pdf [file bmjopen-2022-070822supp003_data_supplement.pdf]

**Supplementary Table 3: Linear regression models of the associations between pre-stroke PASE quartiles, other baseline parameters and mean MDI-score differences one and six months after stroke. A sensitivity analysis without patients who did not participate in the completion of the PASE**

|                                | One month MDI scores      |              |                           |              | Six month MDI scores      |              |                           |              |
|--------------------------------|---------------------------|--------------|---------------------------|--------------|---------------------------|--------------|---------------------------|--------------|
|                                | Unadjusted                |              | Adjusted*                 |              | Unadjusted                |              | Adjusted*                 |              |
|                                | Mean differences (95% CI) | p-value      |
| <b>Pre-stroke PASE score†</b>  |                           |              |                           |              |                           |              |                           |              |
| <b>1<sup>st</sup> quartile</b> | Ref                       | -            | Ref                       | -            | Ref                       | -            | Ref                       | -            |
| <b>2<sup>nd</sup> quartile</b> | -0.9 (-3.1, 1.4)          | 0.439        | -0.4 (-2.7, 2.0)          | 0.761        | -1.7 (-4.0, 0.6)          | 0.138        | -1.4 (-3.8, 1.0)          | 0.248        |
| <b>3<sup>rd</sup> quartile</b> | -2.7 (-4.7, -0.8)         | <b>0.006</b> | -2.7 (-4.6, -0.8)         | <b>0.005</b> | -3.5 (-5.6, -1.4)         | <b>0.001</b> | -3.7 (-5.9, -1.4)         | <b>0.001</b> |
| <b>4<sup>th</sup> quartile</b> | -2.9 (-4.6, -1.1)         | <b>0.002</b> | -2.1 (-4.2, -0.1)         | <b>0.039</b> | -3.0 (-5.2, -0.8)         | <b>0.009</b> | -2.6 (-5.2, -0.1)         | <b>0.041</b> |
| <b>Study treatment</b>         |                           |              |                           |              |                           |              |                           |              |
| <b>Placebo</b>                 | Ref                       | -            | Ref                       | -            | Ref                       | -            | Ref                       | -            |
| <b>Citalopram</b>              | 0.6 (-0.8, 2.0)           | 0.406        | 0.9 (-0.5, 2.3)           | 0.202        | -0.7 (-2.2, 0.7)          | 0.324        | -0.7 (-2.2, 0.7)          | 0.326        |
| <b>Sex</b>                     |                           |              |                           |              |                           |              |                           |              |
| <b>Male</b>                    | Ref                       | -            | Ref                       | -            | Ref                       | -            | Ref                       | -            |
| <b>Female</b>                  | 1.0 (-0.5, 2.5)           | 0.177        | 1.3 (-0.2, 2.8)           | 0.100        | 2.1 (0.5, 3.7)            | <b>0.012</b> | 2.0 (0.3, 3.8)            | <b>0.023</b> |
| <b>Age, per year increase</b>  | 0.01 (-0.05, 0.06)        | 0.867        | -0.05 (-0.12, 0.01)       | 0.103        | 0.004 (-0.06, 0.07)       | 0.895        | -0.06 (-0.12, 0.01)       | 0.115        |
| <b>Cohabitation status</b>     |                           |              |                           |              |                           |              |                           |              |
| <b>Living alone</b>            | Ref                       | -            | Ref                       | -            | Ref                       | -            | Ref                       | -            |
| <b>Cohabitant</b>              | -0.2 (-1.7, 1.2)          | 0.741        | -0.1 (-1.7, 1.5)          | 0.917        | -1.0 (-2.6, 0.7)          | 0.248        | -0.3 (-2.0, 1.4)          | 0.713        |
| <b>Smoking status</b>          |                           |              |                           |              |                           |              |                           |              |
| <b>Never smoker</b>            | Ref                       | -            | Ref                       | -            | Ref                       | -            | Ref                       | -            |
| <b>History of smoking</b>      | -1.3 (-2.8, 0.1)          | 0.072        | -1.2 (-2.6, 0.3)          | 0.109        | -0.6 (-2.1, 0.9)          | 0.435        | -0.3 (-1.8, 1.3)          | 0.736        |

|                                                  |                  |              |                  |              |                   |                   |                   |                  |
|--------------------------------------------------|------------------|--------------|------------------|--------------|-------------------|-------------------|-------------------|------------------|
| <b>Medical history‡</b>                          |                  |              |                  |              |                   |                   |                   |                  |
| <b>Diabetes</b>                                  | 0.5 (-1.6, 2.6)  | 0.627        | 0.5 (-1.6, 2.5)  | 0.666        | -0.1 (-2.2, 2.0)  | 0.893             | -0.7 (-2.7, 1.4)  | 0.523            |
| <b>Hypertension</b>                              | 1.5 (0.1, 2.8)   | <b>0.038</b> | 0.8 (-0.6, 2.2)  | 0.267        | 1.4 (0.0, 2.9)    | 0.050             | 0.8 (-0.8, 2.3)   | 0.319            |
| <b>Atrial fibrillation</b>                       | -0.9 (-2.7, 0.8) | 0.302        | -0.9 (-2.6, 0.8) | 0.307        | -0.8 (-2.6, 1.0)  | 0.402             | -1.2 (-3.0, 0.6)  | 0.188            |
| <b>Previous MI</b>                               | 2.6 (-0.8, 6.1)  | 0.137        | 1.9 (-1.6, 5.4)  | 0.278        | 1.3 (-1.6, 4.2)   | 0.390             | 2.4 (-0.9, 5.7)   | 0.160            |
| <b>Previous TIA</b>                              | 1.6 (-5.7, 8.9)  | 0.671        | 1.8 (-5.5, 9.0)  | 0.629        | -5.3 (-6.8, -3.8) | <b>&lt; 0.001</b> | -5.2 (-6.7, -3.6) | <b>&lt;0.001</b> |
| <b>PVD</b>                                       | 3.3 (-2.2, 8.7)  | 0.239        | 4.2 (-2.0, 10.3) | 0.182        | 0.7 (-3.3, 4.8)   | 0.719             | 0.6 (-4.0, 5.2)   | 0.799            |
| <b>Admission NIHSS score, per point increase</b> | 0.2 (0.0, 0.4)   | <b>0.027</b> | 0.2 (0.0, 0.4)   | <b>0.023</b> | 0.2 (0.0, 0.4)    | 0.076             | 0.2 (0.0, 0.5)    | 0.097            |
| <b>Reperfusion treatment</b>                     |                  |              |                  |              |                   |                   |                   |                  |
| <b>No</b>                                        | Ref              | -            | Ref              | -            | Ref               | -                 | Ref               | -                |
| <b>Yes</b>                                       | 0.0 (-1.4, 1.4)  | 0.986        | -0.3 (-1.8, 1.3) | 0.723        | -0.1 (-1.6, 1.4)  | 0.88              | -0.5 (-2.1, 1.0)  | 0.504            |

MDI: Major depression inventory, CI: confidence interval, PASE: Physical Activity Scale for the Elderly, MI: myocardial infarction, TIA: transient ischemic attack, PVD: peripheral vascular disease, NIHSS: National Institute of Health Stroke Scale

\* Adjusted for citalopram treatment, sex, age, cohabitation, history of smoking, diabetes, hypertension, atrial fibrillation, myocardial infarction, transient ischemic attack, peripheral vascular disease, admission NIHSS score, and reperfusion treatment

† All pre-stroke PASE score quartiles are compared to the highest quartile (1<sup>st</sup> quartile)

‡ For all medical history variables the reference groups are patients who do not have the condition
